# Supplementary material for: Breakthrough of extracellular vesicles in pathogenesis, diagnosis and treatment of osteoarthritis
Source: PubMed Central journal article supplement — Bioact Mater. 2022 Oct 20;22:423–52. doi: 10.1016/j.bioactmat.2022.10.012 (PMC9588998; doi:10.1016/j.bioactmat.2022.10.012), 2022-10-20
Supplement: mmc1.pdf [file mmc1.pdf]

Fig. 8

**Bone marrow mesenchymal stem cell-derived exosomes protect cartilage damage and relieve knee osteoarthritis pain in a rat model of osteoarthritis**

**SPRINGER NATURE**

**Author:** Lei He et al

**Publication:** Stem Cell Research & Therapy

**Publisher:** Springer Nature

**Date:** Jul 10, 2020

*Copyright © 2020, The Author(s)*

**Creative Commons**

This is an open access article distributed under the terms of the [Creative Commons CC BY](#) license, which permits unrestricted use, distribution, and reproduction in any medium, provided the original work is properly cited.

You are not required to obtain permission to reuse this article.

CC0 applies for supplementary material related to this article and attribution is not required.

**Fig. 9****ELSEVIER LICENSE  
TERMS AND CONDITIONS**

Oct 05, 2022

This Agreement between Zichang Liu ("You") and Elsevier ("Elsevier") consists of your license details and the terms and conditions provided by Elsevier and Copyright Clearance Center.

|                              |                                                                                                                            |
|------------------------------|----------------------------------------------------------------------------------------------------------------------------|
| License Number               | 5402521090687                                                                                                              |
| License date                 | Oct 05, 2022                                                                                                               |
| Licensed Content Publisher   | Elsevier                                                                                                                   |
| Licensed Content Publication | Biomaterials                                                                                                               |
| Licensed Content Title       | MSC exosomes alleviate temporomandibular joint osteoarthritis by attenuating inflammation and restoring matrix homeostasis |
| Licensed Content Author      | Shipin Zhang, Kristeen Ye Wen Teo, Shang Jiunn Chuah, Ruenn Chai Lai, Sai Kiang Lim, Wei Seong Toh                         |
| Licensed Content Date        | Apr 1, 2019                                                                                                                |
| Licensed Content Volume      | 200                                                                                                                        |
| Licensed Content Issue       | n/a                                                                                                                        |
| Licensed Content Pages       | 13                                                                                                                         |
| Start Page                   | 35                                                                                                                         |
| End Page                     | 47                                                                                                                         |
| Type of Use                  | reuse in a journal/magazine                                                                                                |
| Requestor type               | academic/educational institute                                                                                             |

**Fig. 9**

|                                              |                                                                                                    |
|----------------------------------------------|----------------------------------------------------------------------------------------------------|
| Portion                                      | figures/tables/illustrations                                                                       |
| Number of figures/tables/illustrations       | 4                                                                                                  |
| Format                                       | both print and electronic                                                                          |
| Are you the author of this Elsevier article? | No                                                                                                 |
| Will you be translating?                     | No                                                                                                 |
| Title of new article                         | Breakthrough of extracellular vesicles in pathogenesis, diagnosis, and treatment of osteoarthritis |
| Lead author                                  | Zichang Liu, Yu Zhuang, Lianfei Fang, Kaili Lin                                                    |
| Title of targeted journal                    | Bioactive Materials                                                                                |
| Publisher                                    | Elsevier                                                                                           |
| Expected publication date                    | Oct 2022                                                                                           |
| Portions                                     | Figures 2,3,5,8                                                                                    |
| Requestor Location                           | Zichang Liu<br>Room1404, building 24, Shiquan Road 300                                             |
| Publisher Tax ID                             | Shanghai, 200061<br>China<br>Attn: Zichang Liu                                                     |
| Publisher Tax ID                             | GB 494 6272 12                                                                                     |
| Total                                        | 0.00 USD                                                                                           |

Fig.10

**Exosomes from antler stem cells alleviate mesenchymal stem cell senescence and osteoarthritis**

**SPRINGER NATURE**

**Author:** Jinghui Lei et al  
**Publication:** Protein & Cell  
**Publisher:** Springer Nature  
**Date:** Aug 3, 2021  
*Copyright © 2021, The Author(s)*

**Creative Commons**

This is an open access article distributed under the terms of the [Creative Commons CC BY](#) license, which permits unrestricted use, distribution, and reproduction in any medium, provided the original work is properly cited.

You are not required to obtain permission to reuse this article.

To request permission for a type of use not listed, please contact [Springer Nature](#)

Fig.12

**Curcumin-primed human BMSC-derived extracellular vesicles reverse IL-1 $\beta$ -induced catabolic responses of OA chondrocytes by upregulating miR-126-3p**

**SPRINGER NATURE**

**Author:** Shushan Li et al

**Publication:** Stem Cell Research & Therapy

**Publisher:** Springer Nature

**Date:** Apr 29, 2021

*Copyright © 2021, The Author(s)*

**Creative Commons**

This is an open access article distributed under the terms of the [Creative Commons CC BY](#) license, which permits unrestricted use, distribution, and reproduction in any medium, provided the original work is properly cited.

You are not required to obtain permission to reuse this article.

CC0 applies for supplementary material related to this article and attribution is not required.

Fig.13

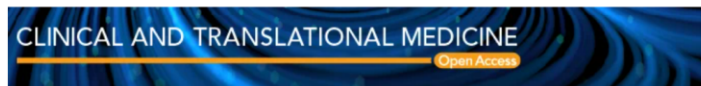

RESEARCH ARTICLE | Open Access |

## The umbilical cord mesenchymal stem cell-derived exosomal lncRNA H19 improves osteochondral activity through miR-29b-3p/FoxO3 axis

Litao Yan, Gejun Liu, Xing Wu

First published: 13 January 2021 | <https://doi.org/10.1002/ctm2.255> | Citations: 17

[Fulltext @SJTU](#)

Litao Yan and Gejun Liu contributed equally to this work.

SECTIONS

PDF TOOLS SHARE

### Abstract

#### Background

Our previous study revealed that the exosomal lncRNA H19 derived from umbilical cord mesenchymal stem cells (UMSCs) plays a pivotal role in osteochondral regeneration. In this study, we investigated whether the exosomal lncRNA H19 could act as a competing endogenous RNA (ceRNA) to potentiate osteochondral activity in chondrocytes.

#### Methods

Dual-luciferase reporter assay, RNA pull-down, RNA immunoprecipitation (RIP), and fluorescence in situ hybridization (FISH) were carried to verify the interaction between miR-29b-3p and both lncRNA H19 and the target mRNA FoxO3. Chondrocytes were treated with UMSC-derived exosomes, which highly expressing lncRNA H19 expression, followed by apoptosis, migration, senescence, and matrix secretion assessments. An in vivo SD rat cartilage defect model was carried out to explore the role and mechanism of lncRNA H19/miR-29b-3p.

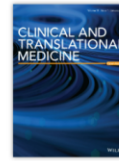

Volume 11, Issue 1  
January 2021  
e255

This article also appears in:  
Clinical and Translational  
Medicine Top Cited Articles  
Published in 2020 and 2021

Advertisement

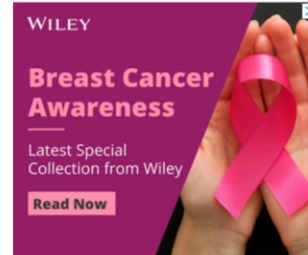

Figures References Related Information

#### Details

© 2021 The Authors. *Clinical and Translational Medicine* published by John Wiley & Sons Australia, Ltd on behalf of Shanghai Institute of Clinical Bioinformatics

This is an open access article under the terms of the [Creative Commons Attribution](#) License, which permits use, distribution and reproduction in any medium, provided the original work is properly cited.

Oct 05, 2022

This Agreement between Zichang Liu ("You") and Elsevier ("Elsevier") consists of your license details and the terms and conditions provided by Elsevier and Copyright Clearance Center.

|                              |                                                                                                                                          |
|------------------------------|------------------------------------------------------------------------------------------------------------------------------------------|
| License Number               | 5402530505552                                                                                                                            |
| License date                 | Oct 05, 2022                                                                                                                             |
| Licensed Content Publisher   | Elsevier                                                                                                                                 |
| Licensed Content Publication | Biomaterials                                                                                                                             |
| Licensed Content Title       | Exosome-mediated delivery of kartogenin for chondrogenesis of synovial fluid-derived mesenchymal stem cells and cartilage regeneration   |
| Licensed Content Author      | Xiao Xu,Yujie Liang,Xingfu Li,Kan Ouyang,Manyi Wang,Tong Cao,Wencui Li,Jianquan Liu,Jianyi Xiong,Biquan Li,Jiang Xia,Daping Wang,Li Duan |
| Licensed Content Date        | Feb 1, 2021                                                                                                                              |
| Licensed Content Volume      | 269                                                                                                                                      |
| Licensed Content Issue       | n/a                                                                                                                                      |
| Licensed Content Pages       | 1                                                                                                                                        |
| Start Page                   | 120539                                                                                                                                   |
| End Page                     | 0                                                                                                                                        |
| Type of Use                  | reuse in a journal/magazine                                                                                                              |
| Requestor type               | academic/educational institute                                                                                                           |

Fig. 14-Left

|                                              |                                                                                                    |
|----------------------------------------------|----------------------------------------------------------------------------------------------------|
| Portion                                      | figures/tables/illustrations                                                                       |
| Number of figures/tables/illustrations       | 3                                                                                                  |
| Format                                       | both print and electronic                                                                          |
| Are you the author of this Elsevier article? | No                                                                                                 |
| Will you be translating?                     | No                                                                                                 |
| Title of new article                         | Breakthrough of extracellular vesicles in pathogenesis, diagnosis, and treatment of osteoarthritis |
| Lead author                                  | Zichang Liu, Yu Zhuang, Lianfei Fang, Kaili Lin                                                    |
| Title of targeted journal                    | Bioactive Materials                                                                                |
| Publisher                                    | Elsevier                                                                                           |
| Expected publication date                    | Oct 2022                                                                                           |
| Portions                                     | Scheme 1 and Figures 3,5                                                                           |
| Requestor Location                           | Zichang Liu<br>Room1404, building 24, Shiquan Road 300                                             |
| Publisher Tax ID                             | Shanghai, 200061<br>China<br>Attn: Zichang Liu                                                     |
| Publisher Tax ID                             | GB 494 6272 12                                                                                     |
| Total                                        | 0.00 USD                                                                                           |



Fig.14-Right

## Reversing the surface charge of MSC-derived small extracellular vesicles by $\epsilon$ PL-PEG-DSPE for enhanced osteoarthritis treatment

Kai Feng, Xuetao Xie, Ji Yuan, Liangzhi Gong, Zhaochen Zhu, Juntao Zhang, Haiyan Li, Yunlong Yang, Yang Wang

First published: 01 November 2021 | <https://doi.org/10.1002/jev2.12160> | Citations: 1

Fulltext @SJTU

SECTIONS

PDF TOOLS SHARE

### Abstract

Mesenchymal stem cell-derived small extracellular vesicles (MSC-sEVs) possess a great therapeutical potential for osteoarthritis (OA) treatment. However, the steric and electrostatic hindrance of cartilage matrix leads to very limited distribution of MSC-sEVs in cartilage and low bioavailability of MSC-sEVs after intra-articular injection. To overcome this, a strategy to reverse the surface charge of MSC-sEVs by modifying the MSC-sEVs with a novel cationic amphiphilic macromolecule namely  $\epsilon$ -polylysine-polyethylene-distearyl phosphatidylethanolamine (PPD) was developed in this study. Through incubation with 100  $\mu\text{g}/\text{ml}$  PPD, positively charged MSC-sEVs (PPD-sEVs) were obtained, and the modification process showed nearly no disturbance to the integrity and contents of sEVs and exhibited good stability under the interference of anionic macromolecules. A more effective cellular uptake and homeostasis modulation ability of PPD-sEVs than unmodified MSC-sEVs to chondrocytes was demonstrated. More importantly, PPD-sEVs demonstrated significantly enhanced cartilage uptake, cartilage penetration, and joint retention capacity as compared to MSC-sEVs. Intra-articular injection of PPD-sEVs into a mouse OA model showed significantly improved bioavailability than MSC-sEVs, which resulted in enhanced therapeutic efficacy with reduced injection frequency. In general, this study provides a facile and effective strategy to improve the intra-articular bioavailability of MSC-sEVs and has a great potential to accelerate the clinical practice of MSC-sEVs based OA therapy.

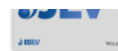

Advertisement

WILEY  
Virtual Event  
5<sup>th</sup> October 2022 | 4pm CEST | 10am EDT  
**How Microgels can Accelerate 3D Bioprinting of Tissues**  
Register now  
MERCK

Figures References Related Information

### Details

© 2021 The Authors. *Journal of Extracellular Vesicles* published by Wiley Periodicals, LLC on behalf of the International Society for Extracellular Vesicles

This is an open access article under the terms of the [Creative Commons Attribution-NonCommercial-NoDerivs License](#), which permits use and distribution in any medium, provided the original work is properly cited, the use is non-commercial and no modifications or adaptations are made.

### Research Funding

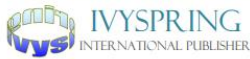

Research Paper

## Chondrocyte-specific genomic editing enabled by hybrid exosomes for osteoarthritis treatment

Yujie Liang<sup>1,2\*</sup>, Xiao Xu<sup>1\*</sup>, Limei Xu<sup>1\*</sup>, Zoya Iqbal<sup>1</sup>, Kan Ouyang<sup>1</sup>, Huawei Zhang<sup>3</sup>, Chunyi Wen<sup>4,5</sup>, Li Duan<sup>1</sup>, Jiang Xia<sup>2</sup>

1. Department of Orthopedics, the First Affiliated Hospital of Shenzhen University, Shenzhen Second People's Hospital, Shenzhen 518035, China.
2. Department of Chemistry, the Chinese University of Hong Kong, Shatin, Hong Kong SAR, China.
3. Department of Biomedical Engineering, South University of Science and Technology of China, Shenzhen, 518055, China.
4. Department of Biomedical Engineering, The Hong Kong Polytechnic University, Hong Kong SAR, China.
5. Research Institute of Smart Ageing, The Hong Kong Polytechnic University, Hong Kong SAR, China.

\*These authors contributed equally to this work.

 Corresponding authors: E-mail: jiangxia@cuhk.edu.hk (J.X.); duanl@szu.edu.cn (L.D.).

© The author(s). This is an open access article distributed under the terms of the Creative Commons Attribution License (<https://creativecommons.org/licenses/by/4.0/>). See <http://ivyspring.com/terms> for full terms and conditions.
